# Supplementary material
Source: Elsevier journal article supplement (https://www.sciencedirect.com/science/article/pii/S2255553618301915)
Supplement: mmc1 [file S2255553618301915:mmc1.docx]

**JPED_2018-514 - Supplementary Material**

**Figure S1 - Correlation in the asthma group between the (A) maximum isometric voluntary contraction (MIVC) of quadriceps femoris and distance walked at modified shuttle test; (B) between the alpha tumor necrosis factor (TNFα) and number of steps.**

**
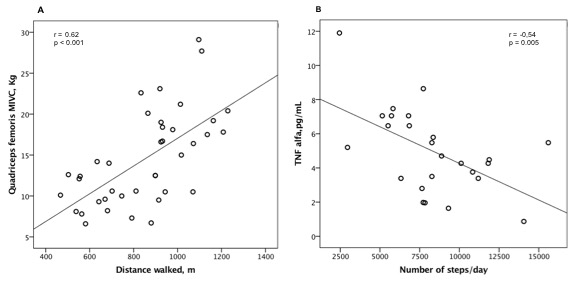
**
